# Supplementary material for: Prevention of prostate cancer metastasis by a CRISPR-delivering nanoplatform for interleukin-30 genome editing
Source: PubMed Central journal article supplement — Mol Ther. 2024 Sep 7;32(11):3932–54. doi: 10.1016/j.ymthe.2024.09.011 (PMC11573607; doi:10.1016/j.ymthe.2024.09.011), 2024-09-07
Supplement: mmc1.pdf [file mmc1.pdf]

**YMTHE, Volume 32**

## **Supplemental Information**

**Prevention of prostate cancer metastasis**

**by a CRISPR-delivering nanoplatform**

**for interleukin-30 genome editing**

**Cristiano Fieni, Stefania Livia Ciummo, Carlo Sorrentino, Simona Marchetti, Simone Vespa, Paola Lanuti, Lavinia Vittoria Lotti, and Emma Di Carlo**

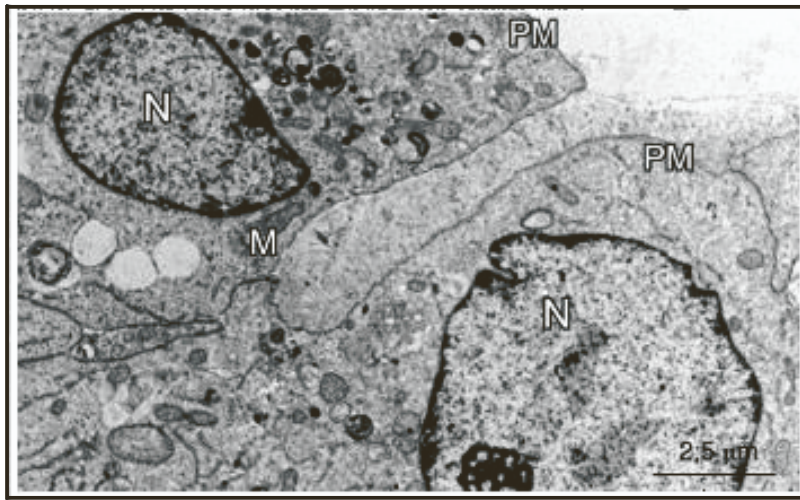

**Figure S1. Ultrastructural features of untreated DU145 cells *in vitro*.** DU145 cells, untreated or PBS-treated, did not exhibit the typical electron-dense spherical vesicles either in the extracellular or cytoplasmic sites. N, nuclei. M, mitochondria. PM, plasma membrane. Ultrastructural images of untreated PC3 cells also lacked the electron-dense spherical vesicles.

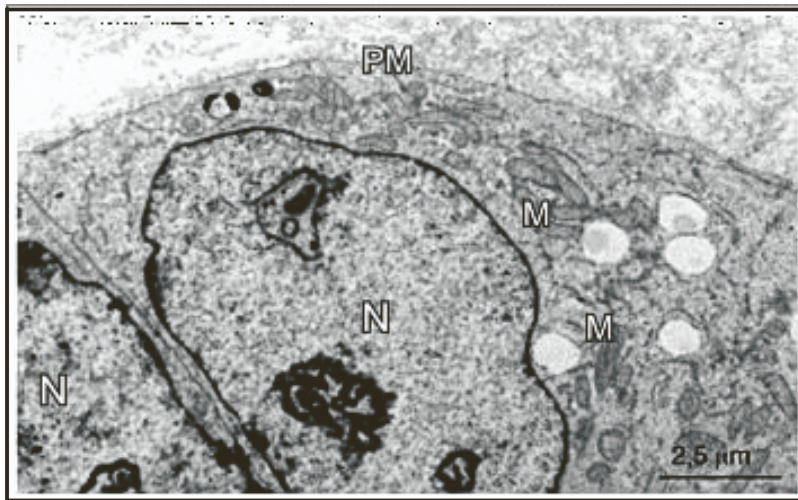

**Figure S2. Ultrastructural features of untreated DU145 cells *in vivo*.** DU145 cell clusters, lodged in the lungs of PBS treated mice, lacked the typical electron-dense spherical vesicles either in the extracellular or cytoplasmic sites. N, nuclei. M, mitochondria. PM, plasma membrane. Ultrastructural images of PC3 cell clusters from the lung of PBS treated mice, also lacked the electron-dense spherical vesicles.

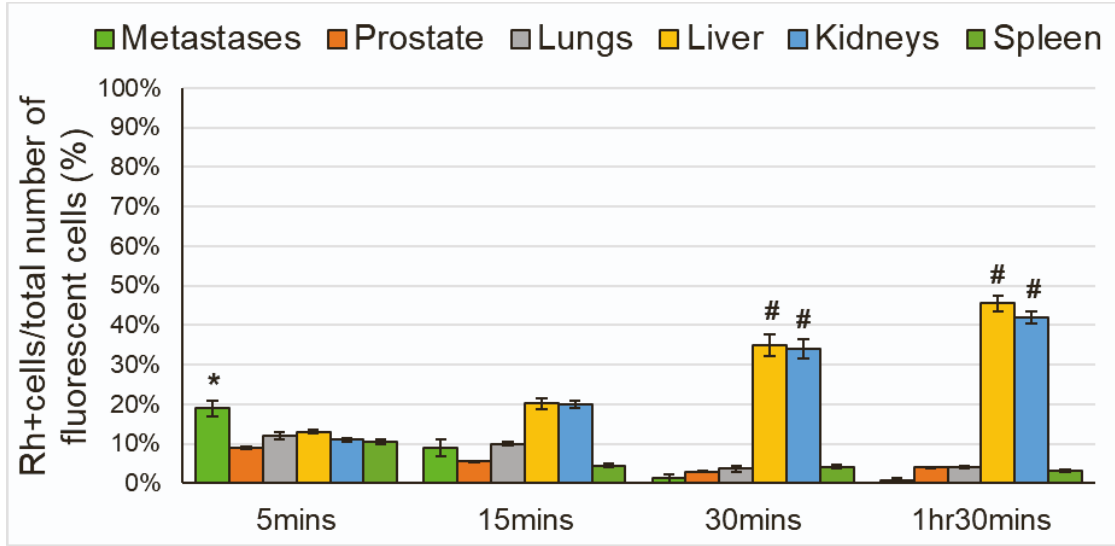

**Figure S3. Quantification of the uptake of NPs by lung metastases, lung parenchyma, prostate, spleen, liver and kidneys, evaluated by LSC microscopy, in mice injected with wild-type DU145 cells and treated with RhB-NPs.** NP uptake was assessed by LSC microscopy, using ZEN Microscopy Software. Results are expressed as mean percentage of RhB<sup>+</sup>GFP<sup>+</sup>cells/total number of GFP<sup>+</sup>cells (for lung metastasis), of RhB<sup>+</sup>EpCam<sup>+</sup>cells/total number of EpCam<sup>+</sup>cells (for lung parenchyma) and of RhB<sup>+</sup>Phalloidin<sup>+</sup>cells/total number of Phalloidin<sup>+</sup>cells (for prostate, spleen, liver and kidneys). ANOVA:  $p < 0.001$ . \* $p < 0.01$ , Tukey HSD test versus organs at the same time point. # $p < 0.01$ , Tukey HSD test versus tumor and other organs at the same time point. The results are comparable with those obtained in mice injected with wild-type PC3 cells and treated with RhB-NPs.

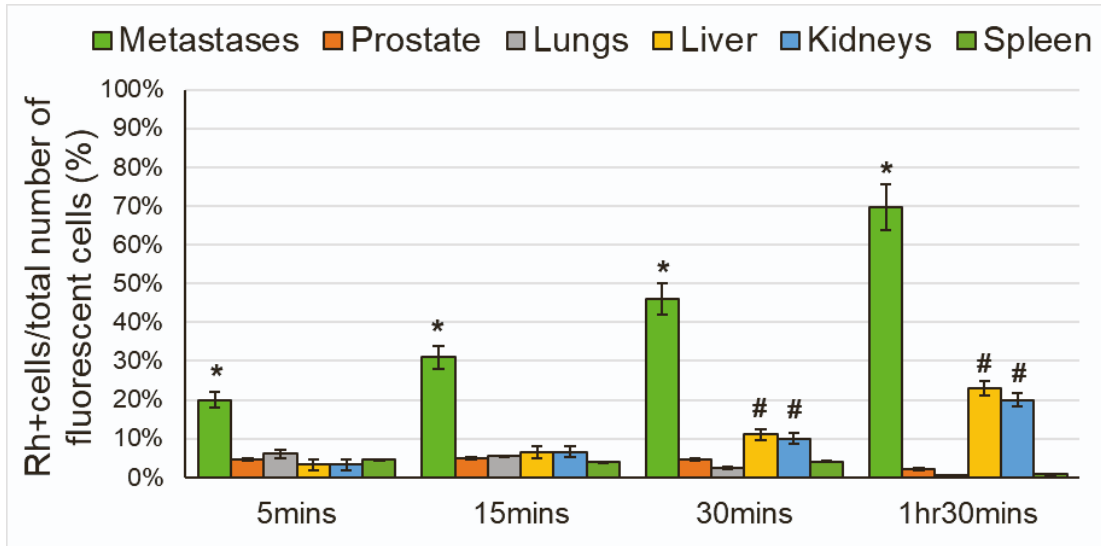

**Figure S4. Quantification of the uptake of NPs by lung metastases, lung parenchyma, prostate, spleen, liver and kidneys, evaluated by LSC microscopy, in mice injected with wild-type DU145 cells and treated with RhB-PSCA-NPs.** NP uptake was assessed by LSC microscopy, using ZEN Microscopy Software. Results are expressed as mean percentage of RhB<sup>+</sup>GFP<sup>+</sup>cells/total number of GFP<sup>+</sup>cells (for lung metastasis), of RhB<sup>+</sup>EpCam<sup>+</sup>cells/total number of EpCam<sup>+</sup>cells (for lung parenchyma) and of RhB<sup>+</sup>Phalloidin<sup>+</sup>cells/total number of Phalloidin<sup>+</sup>cells (for prostate, spleen, liver and kidneys). ANOVA:  $p < 0.001$ . \* $p < 0.01$ , Tukey HSD test versus organs at the same time point. # $p < 0.01$ , Tukey HSD test versus other organs at the same time point. The results are comparable with those obtained in mice injected with wild-type PC3 cells and treated with RhB-PSCA-NPs.

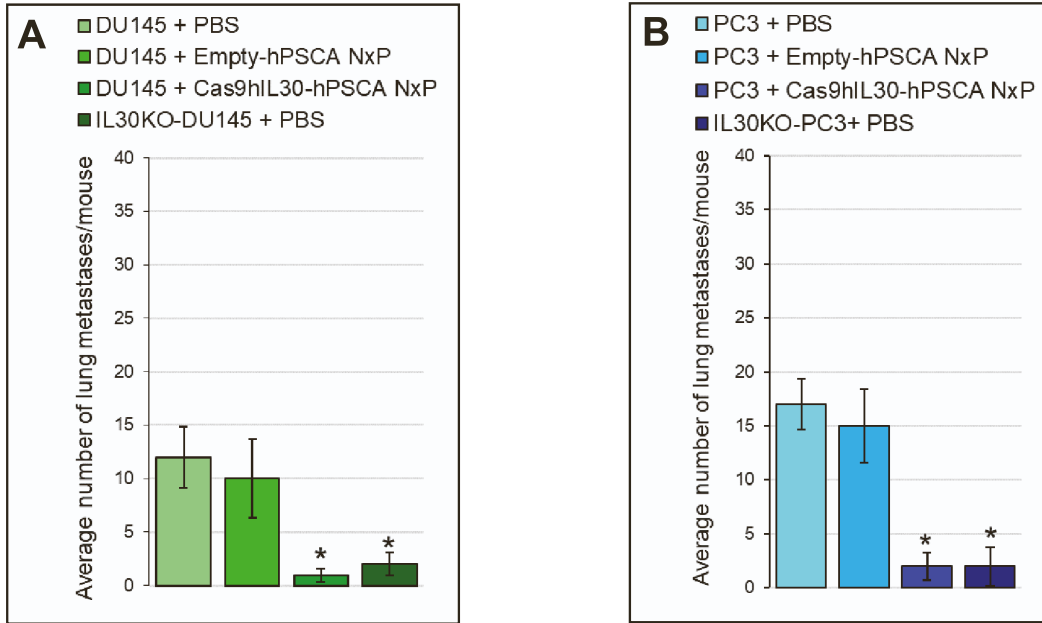

**Figure S5. Treatment of lung PC microemboli with ImmunoLiposomes carrying Cas9gRNA-*hIL30*.**

**A.** Mean number of lung metastasis developed in NSG mice, after i.v. injection of IL30KO or wild type DU145 cells, and 3 treatments with PBS, or Empty-PSCA NP, or Cas9*hIL30*-PSCA NP. ANOVA:  $p < 0.01$ . \* $p < 0.01$ , Tukey HSD test compared with DU145 tumor microemboli treated with PBS or Empty-PSCA NP.

**B.** Mean number of lung metastasis developed in NSG mice, after i.v. injection of IL30KO or wild type PC3 cells, and 3 treatments with PBS, or Empty-PSCA NP, or Cas9*hIL30*-PSCA NP. ANOVA:  $p < 0.0001$ . \* $p < 0.01$ , Tukey HSD test compared with PC3 tumor microemboli treated with PBS or Empty-PSCA NP. ANOVA:  $p < 0.001$ . \* $p < 0.01$ , Tukey HSD test compared with PC3 tumor microemboli treated with PBS or Empty-PSCA NP.

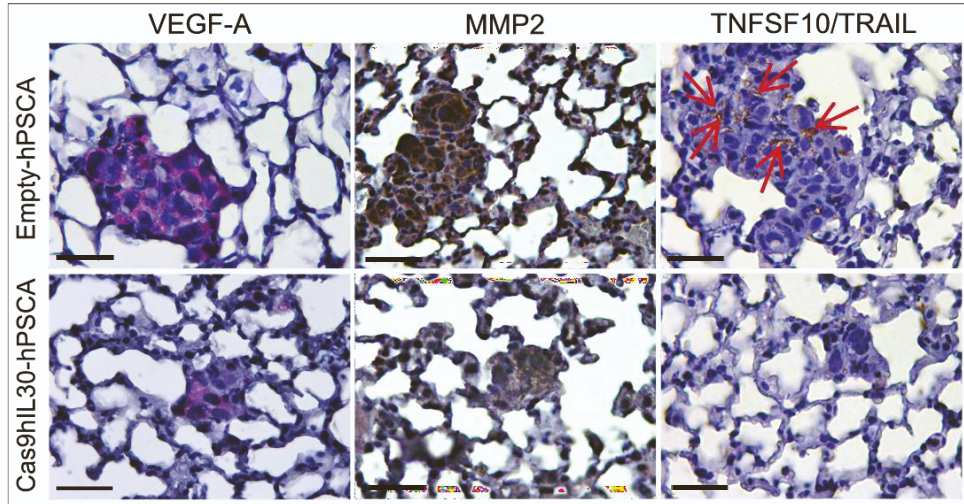

**Figure S6. Immunopathological features of lung metastasis from ImmunoLiposome treated mice.**

Lung metastasis, developed after i.v. inoculation of DU145 cells, from Empty-PSCA NP treated mice show a robust expression of VEGF-A (a), MMP2 (b) and faint cancer cell surface expression of TNFSF10/TRAIL (c). By contrast, metastasis developed in *Cas9hIL30*-PSCA NP-treated animals show a weak expression of VEGF-A (d), and MMP2 (e), while the expression of TNFSF10/TRAIL was absent (f). Immunopathological features of lungs from mice injected with wild type DU145 cells, and treated with PBS were comparable to those of lungs from Empty-PSCA treated mice. Results from mice bearing lung metastasis developed after i.v. inoculation of PC3 cells were comparable to those obtained from mice bearing lung metastasis developed after i.v. inoculation of DU145 cells. Magnification: X400. Scale bars: 40  $\mu$ m.

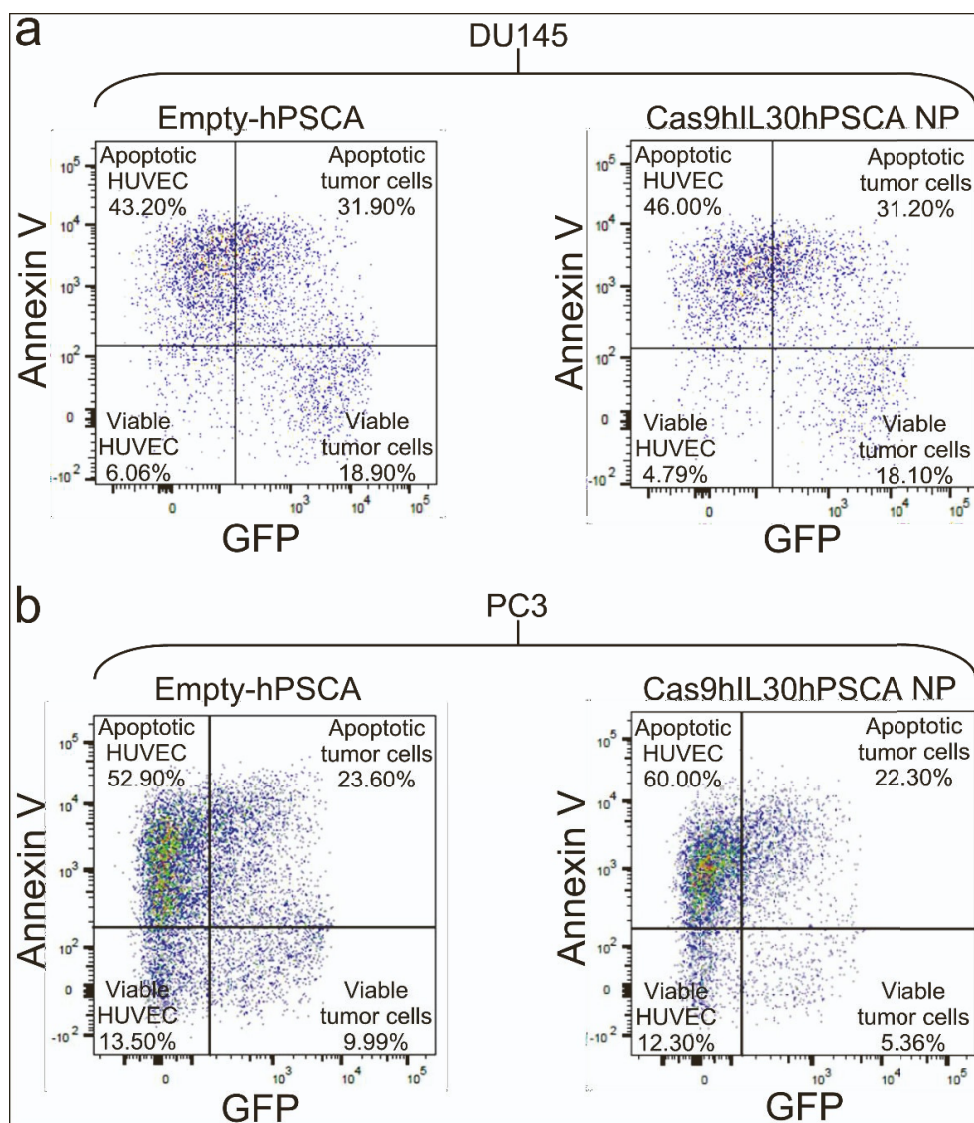

**Figure S7. Annexin V assay on lung spheroids from the 2-OC after ImmunoLiposome treatments.**

Flow cytometric analysis of apoptosis, by Annexin V assay, on DU145 cells + HUVEC (**a**) and PC3 cells + HUVEC (**b**) forming tumor spheroids in the PC-lung on a chip, after the treatment with 5 doses of ImmunoLiposomes. The image is representative of a triplicate experiment.  $p > 0.05$ , Student's *t*-test between apoptotic and viable tumor cells and apoptotic and viable HUVEC.



**Table S1.** Particle size and zeta potential of Empty-PSCA and Cas9*hIL30*-PSCA NPs

| <b>NPs</b>                             | <b>Size (nm)</b> | <b>Zeta (mV)</b> |
|----------------------------------------|------------------|------------------|
| <b>Empty-PSCA NPs</b>                  | 75.8 ± 0.4       | 20.41 ± 3.16     |
| <b>Cas9 gRNA-<i>hIL30</i>-PSCA NPs</b> | 81.8 ± 0.5       | 5.05 ± 1.60      |

**Table S2.** Off-target sites, identified by whole-genome sequencing, associated with the TrueGuide sgRNA CRISPR947272\_SGM and sgRNA 780 CRISPR947284\_SGM, used for IL30 gene editing in DU145 and PC3 cells, respectively (**see the attached excel file “Table S2”**).

**Table S3.** Levels of metabolic markers and inflammatory cytokines in serum samples from BALB/c mice treated with Cas9*hIL30*-PSCA NPs or PBS

|                              | BALB/c              |                                          |
|------------------------------|---------------------|------------------------------------------|
|                              | PBS                 | Cas9 <i>hIL30</i> -PSCA NPs <sup>†</sup> |
| <b>Metabolic markers*</b>    |                     |                                          |
| ALT                          | 15.03 ± 3.23 IU/l   | 16.50 ± 2.63 IU/l                        |
| AST                          | 24.32 ± 2.25 IU/l   | 25.98 ± 3.00 IU/l                        |
| BUN                          | 21.22 ± 3.78 mg/dl  | 22.99 ± 5.50 mg/dl                       |
| CK                           | 160.97 ± 11.73 u/l  | 167.51 ± 11.21 u/l                       |
| Cr                           | 0.50 ± 0.11 mg/dl   | 0.55 ± 0.20 mg/dl                        |
| cTn1                         | 37.30 ± 4.35 ng/ml  | 39.99 ± 5.00 ng/ml                       |
| LDH                          | 275.32 ± 24 u/ml    | 287.23 ± 17.05 u/ml                      |
| <b>Cytokines<sup>#</sup></b> |                     |                                          |
| IL6                          | 95.22 ± 20.44 pg/ml | 103.45 ± 20.63 pg/ml                     |
| TNF $\alpha$                 | 49.08 ± 19.17 pg/ml | 52.10 ± 16.48 pg/ml                      |

**ALT**, alanine aminotransferase; **AST**, aspartate aminotransferase; **BUN**, blood urea nitrogen; **CK**, creatine kinase; **Cr**, creatinine; **cTn1**, cardiac troponin-1; **IU/l**, international units per liter; **LDH**, lactate dehydrogenase; **u/l**, units per liter; **u/ml**, units per milliliter.

\*Levels measured 21 days after starting treatment.

<sup>#</sup>Levels measured 24 hrs after the first treatment.

<sup>†</sup>Results from mice treated with naked Cas9*hIL30* complex or Empty-PSCA NPs were comparable to those from mice treated with Cas9*hIL30*-PSCA NPs.

**Table S4.** Primers used for real-time RT-PCR

| Gene                                                                         | Product code or sequences                                                                | Source                          |
|------------------------------------------------------------------------------|------------------------------------------------------------------------------------------|---------------------------------|
| <b><i>Genes Regulators of EC activation, proliferation and sprouting</i></b> |                                                                                          |                                 |
| <i>ACKR1</i>                                                                 | QT00208719                                                                               | Qiagen, Hilden, Germany         |
| <i>ACKR3</i>                                                                 | QT00069650                                                                               | Qiagen                          |
| <i>ANG</i>                                                                   | QT01675212                                                                               | Qiagen                          |
| <i>CCL2</i>                                                                  | QT00212730                                                                               | Qiagen                          |
| <i>CCR2</i>                                                                  | QT00000224                                                                               | Qiagen                          |
| <i>CTGF</i>                                                                  | QT00052899                                                                               | Qiagen                          |
| <i>CXCR2</i>                                                                 | QT00000518                                                                               | Qiagen                          |
| <i>CXCR4</i>                                                                 | QT00223188                                                                               | Qiagen                          |
| <i>DLL4</i>                                                                  | QT00081004                                                                               | Qiagen                          |
| <i>EDN1</i>                                                                  | QT00088235                                                                               | Qiagen                          |
| <i>FGF1</i>                                                                  | QT00079317                                                                               | Qiagen                          |
| <i>FGF2</i>                                                                  | QT00047579                                                                               | Qiagen                          |
| <i>IL8</i>                                                                   | Forward 5'-ATCTCACTGTGTGTGTAACATGACTTCC-3'<br>Reverse 5'-CACTGACATCTAAGTTCTTTAGCACTCC-3' | Merck, Burlington, MA, USA      |
| <i>JAG1</i>                                                                  | QT00031948                                                                               | Qiagen                          |
| <i>MMP14</i>                                                                 | QT00001533                                                                               | Qiagen                          |
| <i>MMP2</i>                                                                  | Forward 5'-AGCGAGTGGATGCCGCCTTTAA-3'<br>Reverse 5'-CATTCCAGGCATCTGCGATGAG-3'             | Thermo Fisher, Waltham, MA, USA |
| <i>MMP9</i>                                                                  | Forward 5'-GCCACTACTGTGCCTTTGAGTC-3'<br>Reverse 5'-CCCTCAGAGAATCGCCAGTACT-3'             | "                               |
| <i>PDGFA</i>                                                                 | QT01664488                                                                               | Qiagen                          |
| <i>TGFB1</i>                                                                 | QT00000728                                                                               | Qiagen                          |
| <i>VEGF-R1</i>                                                               | QT00073640                                                                               | Qiagen                          |
| <i>VEGF-R2</i>                                                               | QT00069818                                                                               | Qiagen                          |

---

**Epithelial-to-mesenchymal transition (EMT) genes**

|               |                                                                              |               |
|---------------|------------------------------------------------------------------------------|---------------|
| <i>AKT1</i>   | Forward 5'-TGGACTACCTGCACTCGGAGAA-3'<br>Reverse: 5'-GTGCCGCAAAGGTCTTCATGG-3' | Thermo Fisher |
| <i>BMP7</i>   | QT00068936                                                                   | Qiagen        |
| <i>CDH1</i>   | QT00080143                                                                   | Qiagen        |
| <i>ITGB1</i>  | QT00068124                                                                   | Qiagen        |
| <i>MMP2</i>   | Forward 5'-AGCGAGTGGATGCCGCCTTTAA-3'<br>Reverse 5'-CATTCCAGGCATCTGCGATGAG-3' | Sigma         |
| <i>MMP9</i>   | Forward 5'-GCCACTACTGTGCCTTTGAGTC-3'<br>Reverse 5'-CCCTCAGAGAATCGCCAGTACT-3' | Merck         |
| <i>NOTCH1</i> | QT00231056                                                                   | Qiagen        |
| <i>SNAI1</i>  | Forward 5'-CCTCTTCTCTCCATACCT-3'<br>Reverse 5'-TTCATCAAAGTCCTGTGGG-3'        | Merck         |
| <i>SNAI2</i>  | Forward 5'-TGTCATACCACAACCAGAGA-3'<br>Reverse 5'-CTTGGAGGAGGTGTCAGAT-3'      | "             |
| <i>STAT3</i>  | QT00068754                                                                   | Qiagen        |
| <i>TGFB1</i>  | QT00000728                                                                   | Qiagen        |
| <i>TWIST1</i> | Forward 5'-CGGAGACCTAGATGTCATT-3'<br>Reverse 5'-CTGTCTCGCTTTCTCTTTT-3'       | Merck         |
| <i>TWIST2</i> | Forward 5'-AACTGGACCAAGGCTCTC-3'<br>Reverse 5'-GCGGCGTGAAAGTAAGAAT-3'        | "             |
| <i>VIM1</i>   | QT00095795                                                                   | Qiagen        |
| <i>WNT11</i>  | QT00018270                                                                   | Qiagen        |
| <i>WNT3A</i>  | QT00220542                                                                   | Qiagen        |
| <i>WNT5A</i>  | QT00025109                                                                   | Qiagen        |
| <i>ZEB1</i>   | Forward 5'-CCAACAGACCAGACAGTG-3'<br>Reverse 5'-TGACTCGCATTTCATCATCTT-3'      | Merck         |
| <i>ZEB2</i>   | Forward 5'-CGGAGACTTCAAGGTATAATC-3'<br>Reverse 5'-GTTACGCCTCTTCTAATGACA-3'   | "             |

---

**Table S5.** Antibodies used in immunostaining

| <b>Antibody</b>          | <b>Clone</b> | <b>Origin</b> | <b>Research Resource Identifiers (RRIDs) or product code</b> | <b>Source</b>                           |
|--------------------------|--------------|---------------|--------------------------------------------------------------|-----------------------------------------|
| <b><i>Anti-human</i></b> |              |               |                                                              |                                         |
| CDH1                     | NCH-38       | Mouse         | RRID:AB_2076672                                              | Agilent, Santa Clara, CA, USA           |
| Ki67                     | MIB1         | Mouse         | RRID:AB_2142367                                              | “                                       |
| IGF1                     |              | Rabbit        | RRID:AB_308724                                               | Abcam, Cambridge, UK                    |
| IL30                     |              | Rabbit        | RRID:AB_10898806                                             | “                                       |
| METAP-2                  |              | Mouse         | RRID:AB_2723358                                              | “                                       |
| PSCA                     |              | Rabbit        | RRID:AB_2662130                                              | “                                       |
| CXCL2                    | OTI1F6       | Rabbit        | 500-P130                                                     | PeproTech EC, London, UK                |
| MMP2                     |              | Mouse         | RRID:AB_2881746                                              | Proteintech, Rosemont, IL, USA          |
| TNFSF10 (TRAIL)          | 2B10D1K18    | Goat          | SC-6079                                                      | Santa Cruz Biotechnology, Texas, USA    |
| VEGF-A                   |              | Rabbit        | RRID:AB_149827                                               | Thermo Fisher, Waltham, MA, USA         |
| <b><i>Anti-mouse</i></b> |              |               |                                                              |                                         |
| CD11b                    | EPR1344      | Rabbit        | RRID:AB_2650514                                              | Abcam, Cambridge, UK                    |
| Gr-1                     | RB6-8C5      | Rat           | RRID:AB_394638                                               | BD Biosciences, Franklin Lakes, NJ, USA |
| Ly-6G                    | 1A8          | Rat           | RRID:AB_1089179                                              | BioLegend, San Diego, CA, USA           |

## **SUPPLEMENTAL MATERIALS AND METHODS**

### **Flow cytometry and antibody conjugation efficiency**

To assess PSCA expression, DU145 and PC3 cells were harvested and mechanically dissociated into a single cell suspension. The cells were pelleted and resuspended in PBS with 0,5% BSA and incubated for 30 mins, at 4 °C, with anti-PSCA Ab (Thermo Fisher Scientific Cat# PA5-65080, RRID:AB\_2662130). Subsequently, cells were pelleted and washed in PBS, and incubated for 30 mins, in at 4 °C, with Alexa fluor 488 secondary Ab (Thermo Fisher Scientific Cat# A-11008, RRID:AB\_143165). Acquisition was performed using a BD Scientific Canto II Flow Cytometer (RRID:SCR\_018056), and the data were analyzed using FlowJo software (RRID:SCR\_008520). Dead cells were excluded by 7AAD staining.

Conjugation efficiency, between the anti-PSCA Ab and the Aldehyde-modified DSPE-PEG2000 lipid present on the external layer of the NP, was assessed by flow cytometry. Briefly,  $1 \times 10^6$  PC cells were seeded in T25 cell culture flasks and, after 24 hrs, they were incubated for 1 hr with Rhodamine labelled NPs, conjugated or not with anti-PSCA Abs. Cells were harvested and mechanically dissociated into a single cell suspension. The cells were then pelleted by centrifugation at 230g, washed in PBS, and analysed as described above.

### **TEM analyses of prostate cancer spheroids incorporated in the 2-OC platform**

The 3D PC spheroid models, composed by DU145 or PC3 cells, and HUVEC, cocultured into a 24-well ultra-low attachment plate (#174930; Thermofisher Scientific) were treated with a 1:25 dilution of Cas9IL30 NPs, or Cas9IL30-PSCA NPs, for 1, 2 or 3 hrs in fresh culture medium, or left untreated. Then, PC spheroids were fixed in 2.5% glutaraldehyde, post-fixed in osmium tetroxide, and embedded in Epon 812. Ultrathin sections were stained with uranyl

acetate–lead citrate and analyzed with a Philips CM10 and a Fei-Philips Morgagni 268D transmission electron microscope (Philips, Eindhoven, NL).

### **Assessment of PC and endothelial cell viability in PC spheroids**

Viability and apoptosis of tumor and endothelial cells, were assayed by flow cytometry. At the end of the experiment, the tumor spheroids were collected from the insert of the 24-well compartment of the 2-OC chip and centrifuged. Supernatants from the samples were collected and frozen for subsequent analysis. The collected spheroids were washed with PBS and dissociated into a single cell suspension with Accumax Cell Aggregate Dissociation Medium (#00-4666-56; Thermofisher Scientific). Each sample was divided into two parts, one half was used for the proliferation analysis while the other half was used for the apoptosis assay.

Proliferation was investigated by Ki67 staining. Briefly, pelleted cells were fixed and permeabilized with the BD Cytfix/Cytoperm™ Fixation/Permeabilization Kit (#554714; BD Biosciences, Franklin Lakes, NJ, USA) according to manufacturer's protocol. The cells were then resuspended in staining buffer and incubated for 30 mins, at 4 °C, with anti-Ki67 antibody (Thermo Fisher Scientific Cat# 17-5698-82, RRID:AB\_2688057). To detect apoptosis, Pacific Blue™ Annexin V/SYTOX™ AADvanced™ Apoptosis kit was used (#A35136; Thermofisher Scientific) according to manufacturer's protocol. All samples were counterstained with DRAQ5™ Fluorescent Probe Solution to identify individual cells (#62251; Thermofisher Scientific). Samples were acquired on BD FACS Verse Flow Cytometer, and the data were analyzed using FlowJo software (RRID:SCR\_008520).

Proliferation and Apoptosis analysis of both tumor and endothelial cells was performed by 1) identifying the DRAQ5 positive cells, 2) by discriminating, from the DRAQ5 positive population, the GFP positive cells (DU145 or PC3 tumor cells) and GFP negative cells



(endothelial cells), 3) identifying the Ki67 positive cells and AnnexinV positive cells present in both the GFP positive and negative populations.

### **Assessment of PC cell colonization of lung spheroids or bone marrow scaffolds in the 2-OC platform**

To assess the effects of the NP treatment on the metastatization process, the number of tumor cells (GFP<sup>+</sup>) within the bone marrow scaffold or lung spheroids was quantified by flow cytometry. Briefly, at the end of the experiment both the bone marrow scaffold and lung spheroids were processed to obtain a single cell suspension. Subsequently, the bone marrow scaffolds were washed several times with a solution of PBE (PBS without calcium and magnesium, containing 0,5M EDTA and 0,6% BSA). The scaffolds were then incubated in this solution for 15 mins at room temperature and then washed and incubated with TrypLE™ Express Enzyme (#12605010; Thermofisher Scientific) at room temperature, for another 15 mins Both PBE and Tryple solutions, containing the cell suspensions, were collected and centrifuged at 300g for 10 mins, to pellet the cells. The pelleted cells were then resuspended in PBS and stained with Vybrant™ DyeCycle™ Violet Stain (#V35003; Thermofisher Scientific), to discriminate nucleated cells from potential debris of the bone marrow scaffold. The lung spheroids were collected, washed with PBS, and dissociated into a single cell suspension with Accumax Cell Aggregate Dissociation Medium (#00-4666-56; Thermofisher Scientific). The cells were then pelleted and resuspended in PBS and counterstained with Vybrant™ DyeCycle™ Violet Stain (#V35003; Thermofisher Scientific), to identify individual cells.

The cell suspensions from either bone marrow and lung spheroids were then acquired and analyzed on a BD FACS Verse Flow Cytometer. The quantification was performed 1) by identifying the Vybrant Dye positive cells, 2) by discriminating, from the Vybrant Dye positive

populations, the GFP positive cells. The number of GFP positive events were expressed in events/uL.

### **PCR array and real-time RT-PCR**

RNA extraction was performed by using the RNeasy Mini Kit (#74104; Qiagen, Hilden, Germany), and reverse-transcribed with the RT<sup>2</sup> First Strand Kit (#330401; Qiagen). PCR array analyses were run on a Qiagen Rotor Gene Q (RRID:SCR\_018976), using the RT<sup>2</sup> Profiler PCR Array Human Tumor Metastasis (#PAHS-028Z; Qiagen, Hilden, Germany). The results from each plate were normalized to the median value of a set of housekeeping genes. Changes in the gene expression were calculated using the  $\Delta\Delta C_t$  method. Results from experiments performed in triplicate were pooled and analyzed with the manufacturer's software. A significant threshold of a 2-fold change in gene expression corresponded to a  $p < 0.001$ .

For the analysis of the expression of epithelial to mesenchymal (EMT) transition genes and genes involved in endothelial cells activation, proliferation and sprouting, the real-time RT-PCR reaction was performed with the Quantifast SYBR Green PCR Kit (#204054; Qiagen) and a MiniOpticon System (#CFB-3120; Bio-Rad, Hercules, CA, USA) using the primers listed in Table S4.

The results from each plate were normalized to the median value of the housekeeping gene HPRT. Changes in the gene expression were calculated using the  $\Delta\Delta C_t$  method. Results from experiments performed in triplicate were pooled and analyzed with the manufacturer's software. A significant threshold of a 2-fold change in gene expression corresponded to a  $p < 0.001$ .

## **Histology, immunohistochemistry and TUNEL assay**

For histology, tissue samples were fixed in 4%-formalin, embedded in paraffin, sectioned at 4- $\mu\text{m}$  and stained with H&E. Single or double (CD11b/Gr-1, and NKp46/ROR $\gamma$ t) immunostainings, on formalin fixed and paraffin-embedded, or frozen, tissue sections, were performed as described,<sup>1,2</sup> by using the antibodies listed in the Table S5. Proliferation index and microvessel count were assessed by light microscopy, at  $\times 400$  in an 85,431.59  $\mu\text{m}^2$  field, on single immunostained sections, using QWin image analysis software (Leica QWin, RRID:SCR\_018940), which ensures the following highly reproducible steps: 1) image acquisition; 2) conversion of RGB image (true colors) to binary image (black and white); 3) filtering to remove noise; 4) counting of immunostained cells or measurement of positively stained area. Six to eight high-power fields were analyzed for each section and three sections per sample were evaluated. The histopathological evaluation was performed excluding necrotic areas. Proliferation index was expressed as mean percentage  $\pm$  SD of Ki67 positive cells/number of total cells per field (85431.59  $\mu\text{m}^2$ ). Microvessels were identified as small tubes or circles marked by CD31 Abs and results were expressed as mean  $\pm$  SD of positive vessels/field. Immunostained sections were examined by two pathologists in a blind fashion, with very good agreement ( $\kappa$  value=0.89, 0.80 and 0.85, for evaluation of proliferation, apoptotic index, and microvessel density, respectively).

The assessment of granulocyte (Ly-6G) and myeloid-derived cell (Gr-1/CD11b) infiltrates of metastatic foci was performed according to the Tumor Area Positivity (TAP) score, as described in ref. doi: 10.1186/s13000-023-01318-8, using the QWin image analysis software (Leica QWin, RRID:SCR\_018940) on single immunostained sections. Briefly, on each slide, the total area of metastases (tumor area) was visually identified by a pathologist and measured by the Qwin software. Subsequently, the Ly6G<sup>+</sup> granulocytes and Gr-1<sup>+</sup>/CD11b<sup>+</sup> myeloid-derived cells infiltrating the tumor area were automatically counted by the Qwin software and the TAP score was obtained using the following formula: area covered by Gr-

1<sup>+</sup>, or Gr-1<sup>+</sup>/CD11b<sup>+</sup> cells/total tumor area x 100. Three sections per sample were evaluated by two pathologists in a blind fashion, with very good agreement ( $\kappa$  value=0.89).

The human prostate tissue samples, for immunostaining with anti-PSCA Abs, were obtained from the institutional Biobank of the Local Health Authority n. 2 Lanciano - Vasto - Chieti (Italy) and the personal data processing complies with Data Protection Laws.

## REFERENCES

1. Sorrentino C, D'Antonio L, Ciummo SL, Fieni C, Landuzzi L, Ruzzi F, Vespa S, Lanuti P, Lotti LV, Lollini PL, et al. CRISPR/Cas9-mediated deletion of Interleukin-30 suppresses IGF1 and CXCL5 and boosts SOCS3 reducing prostate cancer growth and mortality. *J Hematol Oncol.* 2022 Oct 13;15(1):145.
2. Sorrentino C, Ciummo SL, D'Antonio L, Fieni C, Lanuti P, Turdo A, Todaro M, Di Carlo E. Interleukin-30 feeds breast cancer stem cells via CXCL10 and IL23 autocrine loops and shapes immune contexture and host outcome. *J Immunother Cancer.* 2021 Oct;9(10):e002966.
